# Supplementary material
Source: publisher figshare collection journal article supplement (https://tandf.figshare.com/ndownloader/files/22409052)
Supplement: Supplementary file 1 [file 22409052]

1    **Supplemental material for**  
2    **Anti-biofilm activity of a novel pit and fissure self-adhesive sealant**  
3    **modified with metallic monomers**

4    Alexandra Rubin Cocco<sup>1,2</sup>, Carlos Enrique Cuevas-Suárez<sup>1</sup>, Yuan Liu<sup>2</sup>,  
5    Rafael Guerra Lund<sup>1</sup>, Evandro Piva<sup>1,\*</sup>, Geelsu Hwang<sup>2,3,4,\*</sup>

6    *<sup>1</sup>Department of Restorative Dentistry, School of Dentistry Federal University of*  
7    *Pelotas, Pelotas, RS, Brazil*

8    *<sup>2</sup>Biofilm Research Labs, Levy Center for Oral Health, Department of Orthodontics and*  
9    *Divisions of Pediatric Dentistry & Community Oral Health, School of Dental Medicine,*  
10    *University of Pennsylvania, PA, USA*

11    *<sup>3</sup>Department of Preventive and Restorative Sciences, School of Dental Medicine,*  
12    *University of Pennsylvania, PA, USA*

13    *<sup>4</sup>Center for Innovation & Precision Dentistry, School of Dental Medicine, University*  
14    *of Pennsylvania, Philadelphia, PA 19104*

15    **Corresponding Authors:**

16    G. Hwang, 240 South 40th Street, Levy Bldg. Rm 422, Philadelphia, PA 19104, USA

17    Email: [geelsuh@upenn.edu](mailto:geelsuh@upenn.edu)

18    E. Piva, Gonçalves Chaves St., 457, 5th floor, 96015- 560 Pelotas, RS, Brazil.

19    Email: [evpiva@gmail.com](mailto:evpiva@gmail.com)

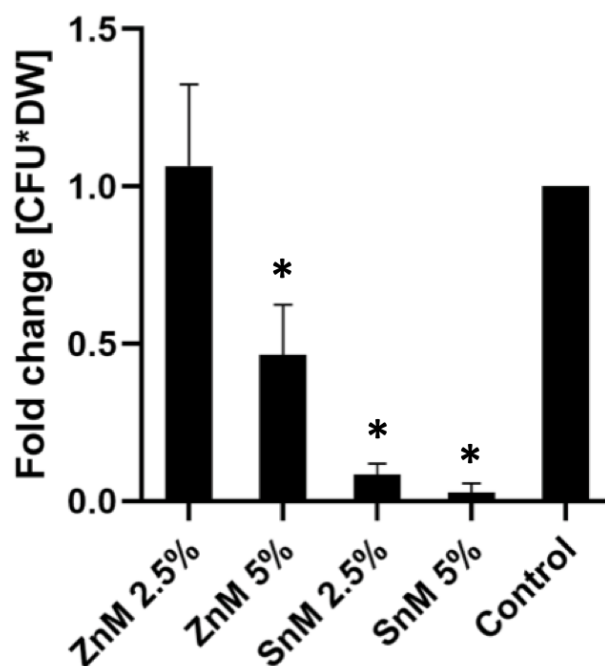

20

21 **Supplemental material figure S1.** Fold changes of CFU\*DW of 42 h old  
 22 *Streptococcus mutans* biofilms formed on each surface. \* indicates that the values are  
 23 significantly different from those of the control surface ( $p < 0.05$ ) (n=4).

24

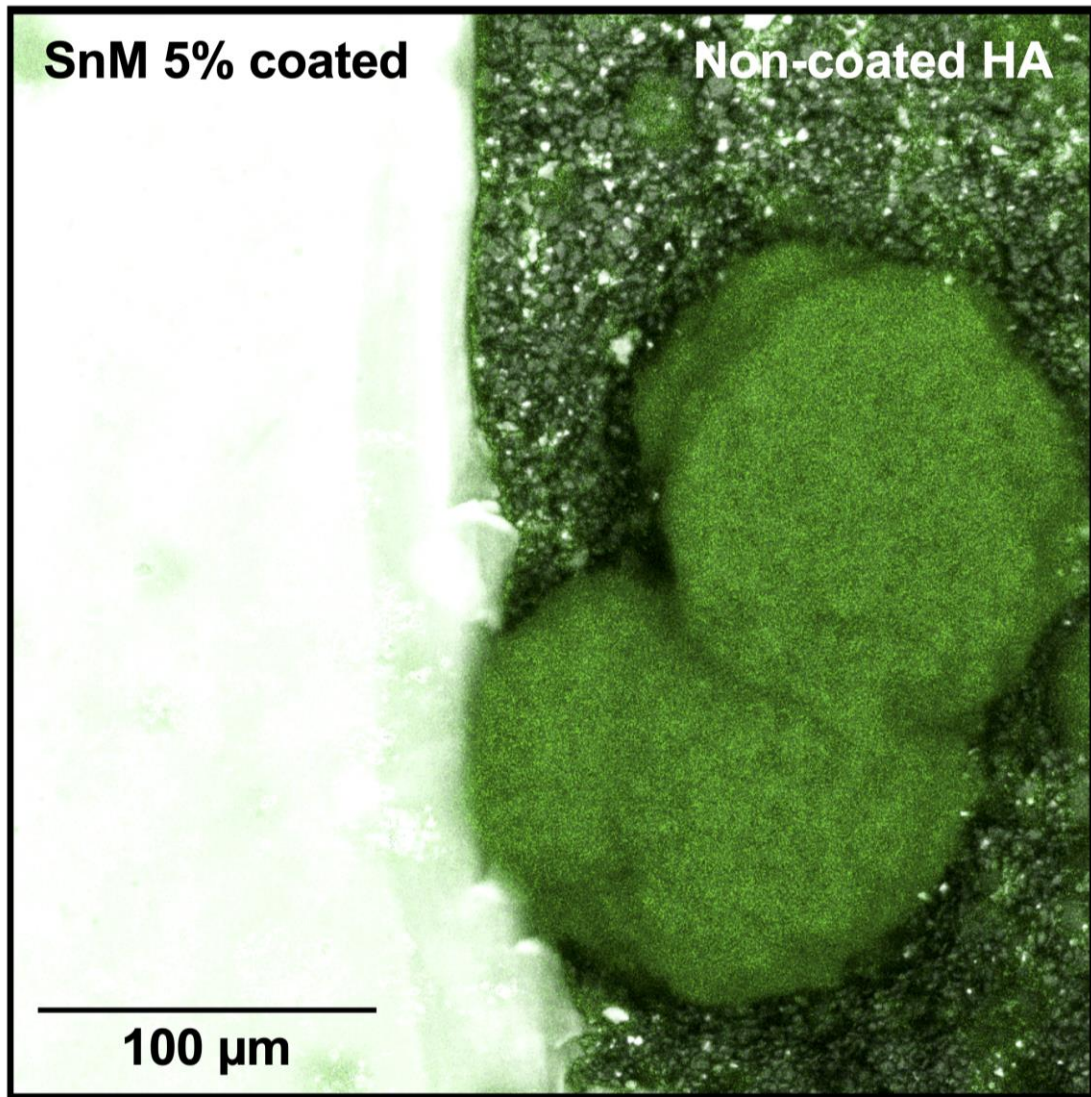

25  
26 **Supplemental material figure S2.** Representative confocal images of 42 h old  
27 *Streptococcus mutans* single-species biofilms formed on hydroxyapatite (HA) disc with  
28 or without SnM 5% coating. There are no visible biofilms formed on SnM 5% coated  
29 area (white), while sizeable microcolonies were observed on the non-coated bare HA  
30 disc surface.
